# Supplementary material
Source: PubMed Central journal article supplement (PMC4975685)

## **Supplementary Data**

Acetylation of Lysine 109 Modulates Pregnane X Receptor DNA Binding and Transcriptional Activity

**Danielle Pasquel, Aneta Doricakova, Hao Li, Sandhya Kortagere, Matthew D. Krasowski, Arunima Biswas, William G. Walton, Matthew M. Redinbo, Zdenek Dvorak, and Sridhar Mani**

Figure 1: Pairwise sequence alignment of PPAR- $\gamma$  with human PXR is shown with the position of K155 (of PPAR- $\gamma$ ) and K109 (PXR) that are predicted to be acetylated indicated with arrows.

Figure 2: Structural superpositioning of PXR LBD (in orange ribbons) derived from the crystal structure complex of PXR-RXR (pdb code: 4j5w) with the full length modeled PXR structure (in pink ribbons) is shown. Note, the LBD of the model superimposes with a rmsd of 0.8 Å.

Figure 3: Structural superpositioning of the wild type PXR (light pink)-DNA(green-red)-RXR (orange) on to the model of K109-Ac PXR (red)-DNA (gren-red)-RXR (orange) is shown in cartoon format with K109 in both models represented as ball and sticks and colored atom type (C-grey, N-blue, O-red, H-white). The co-factors and antagonist peptide are shown as magenta and cyan ribbons.

Coordinates of PXR-RXR-DNA model in PDB format is provided as an attachment. Please note, since the coordinates for PXR are numbered from residue 1 instead of 37, K109 will be K72.

Figure 1

```

PPAR-g      MGETLGDSPIDPESDSFTDTLSANISQEMTMVDTEMPFWPTNFGISSVDLSVMEDHSHSF 60
PXR         -----M 1
           :

PPAR-g      DIKPFITVDFSSISTPHYEDIPFTRIDPVVADYKYDLKLQEQYQSAIKVEPASPPYYSEKI 120
PXR         EVRPKE--SWNHADFVHCEDTESVPGKPSVN----- 30
           :::*   .:.   . * **   . . * *

PPAR-g      QLYNKPHEEPSNSLMAIECRVCGDKASGFHYGVHACEGCKGFFRRTIR--LKLIYDRCDL 178
PXR         ----ADEEVGG---PQICRVCGDKATGYHFNVMTCGCKGFFRRAMKRNRARLRCPFRKG 82
           . ** ..   . *****:~::~* :*****:~::~*
           ↓

PPAR-g      NCRIRKSRNKQCYCRFQKCLAVGMSHNAIRFGRMPQAEKEKLLAEIS--SDIDQLNPE- 235
PXR         ACEITRKRTRRQCQACRLRKCLESGMKEMIMSDEAVEERRALIKRKKSERIGTQPLGVQG 142
           * . * :~::~* *~::~* *~::~* * .. : : : * .. : * . :
           ↑

PPAR-g      -SADLRALAKHLYDSYIKSFPLTKAKAR-----AILTG-----KTTD 271
PXR         LIEEQRMIRELMDAQMKTFDITFSHFKNFRLPGVLSGCELPESLQAPSREEAAKWSQV 202
           : : * : :~::~* :~::~* * : : :   .:~::~.

PPAR-g      KSPFVIYDMNSLMMGEDKIKFKHITPLQEQSKEVAIRIFQGCQFRSVEAVQEITEYAKSI 331
PXR         RKDLCSLKVSLQLRGEDGSVWNYKPPADSGGKEIFS--LPHMADMSTYMFKGIISFAKVI 261
           :. :   .:.   : ***   :~::~* .. . ** : :   * . . : * . : ** *

PPAR-g      PGFVNLDLNDQVILLKYGVEIIYTMLASIMNKDGVLISEGQGFMTREFLKSRLKPFQDF 391
PXR         SYFRDLPIEDQISLLKGAAFELCQLRFNTVFNAETGTWECGR--LSYCLEDTAGGFQQLL 319
           . * * :~::~*~::~* ..* :   :~::~* :   . * : : : : :

PPAR-g      MEPKFEFAVKFNALELDDSDLAIFIAVIIISGDRPGLLNVKPIEDIQDNLLQALELQLKL 451
PXR         LEPLMKFHYMLKQLHEEEYVLMQAI SLFSPDRPGVLQHRVVDQLQEQFAITLKSIEC 379
           : ** : * : : *~::~. : : : * : : * ~::~* : : : :~::~* : : * : :

PPAR-g      NHPESQ--LFAKLLQKMTDLRQIVTEHVQLLQVIKKTETDMSLHPLLQEIYKDLY- 505
PXR         NRPQPAHRFLFKIMAMLELRSINAQHTQRLLRIQDIHP--FATPLMQELFGITGS 434
           *~::~. : : * * : : :~::~* * :~::~* * * . .   *~::~* : :
    
```

Figure 2

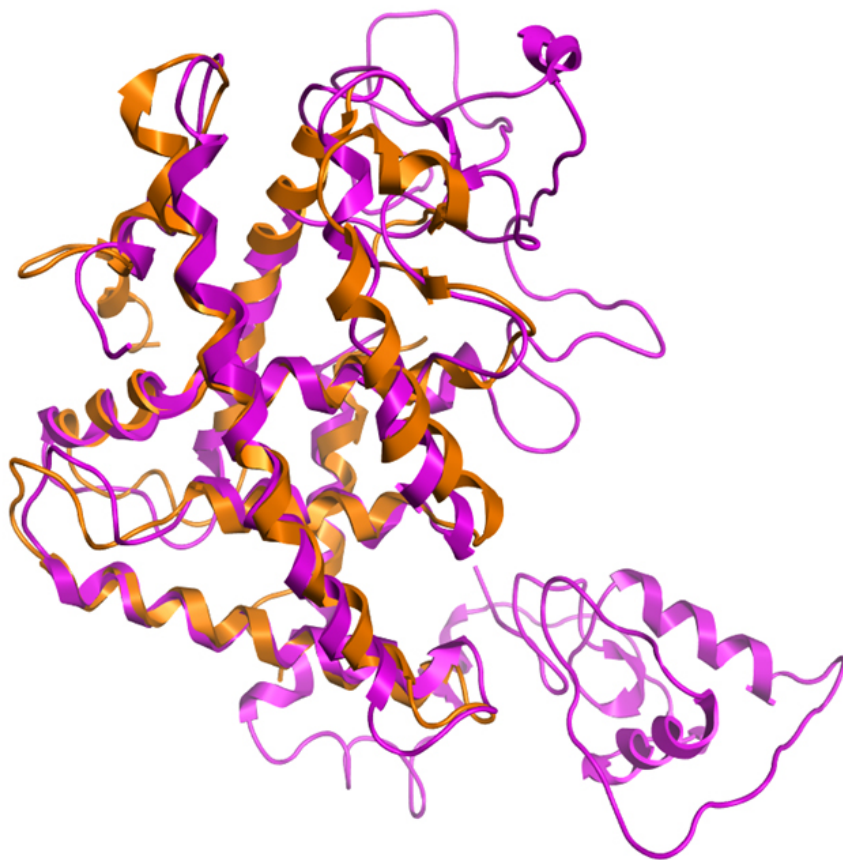

Figure 3

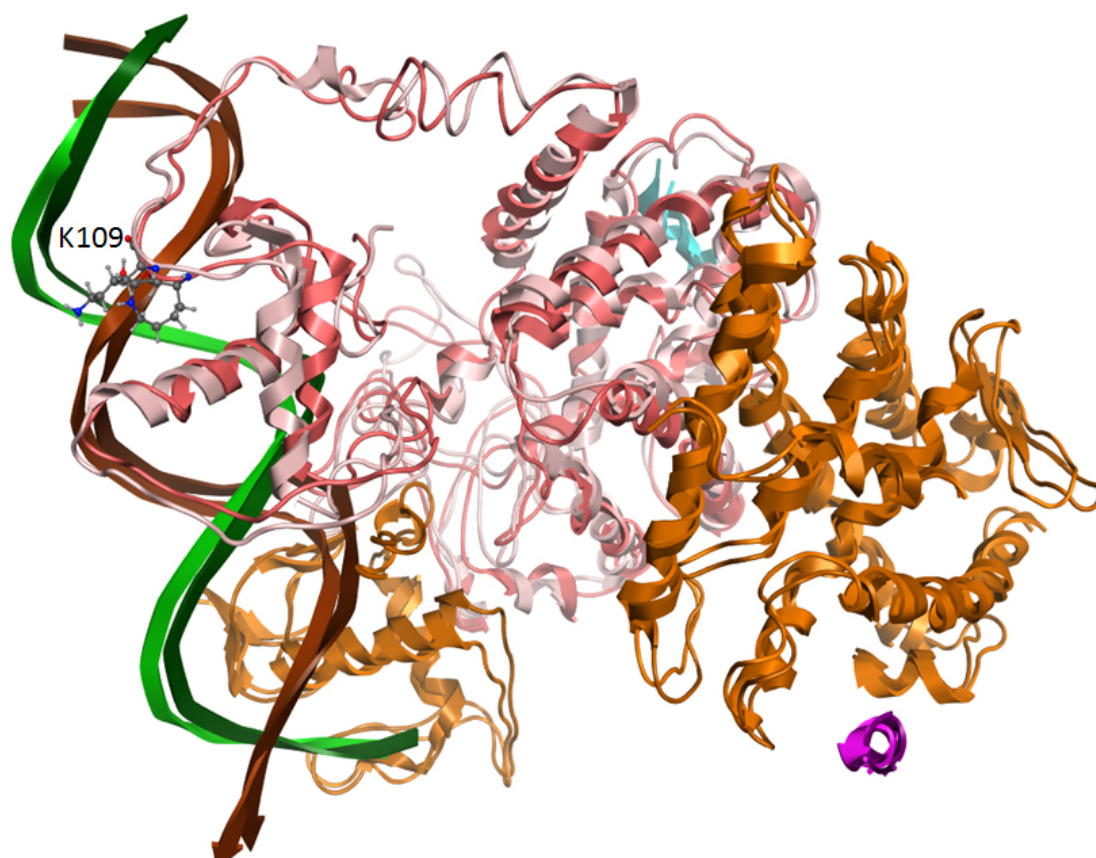

Supplement: NIHMS758004-supplement-2.pdf [file NIHMS758004-supplement-2.pdf]
